# Supplementary figures and images for: A layered Ge2Sb2Te5phase change material
Source: Royal Society of Chemistry journal article supplement (doi:10.1039/c9nr08745a), 2020-01-01

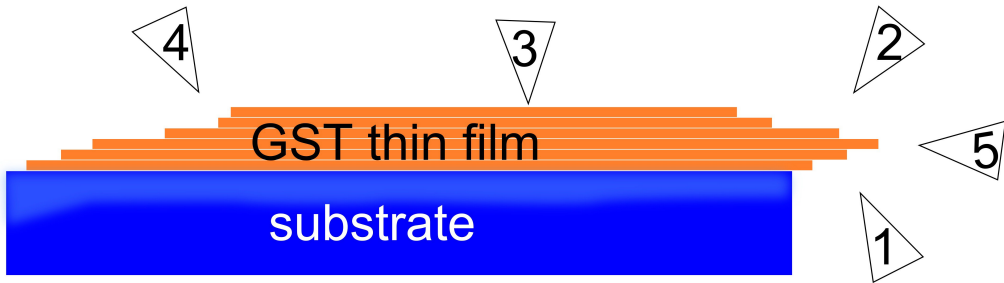

Supplement: c9nr08745a2.pdf [file c9nr08745a2.pdf]

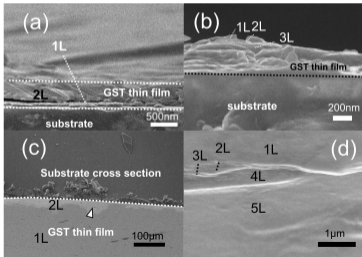

Supplement: c9nr08745a3.pdf [file c9nr08745a3.pdf]

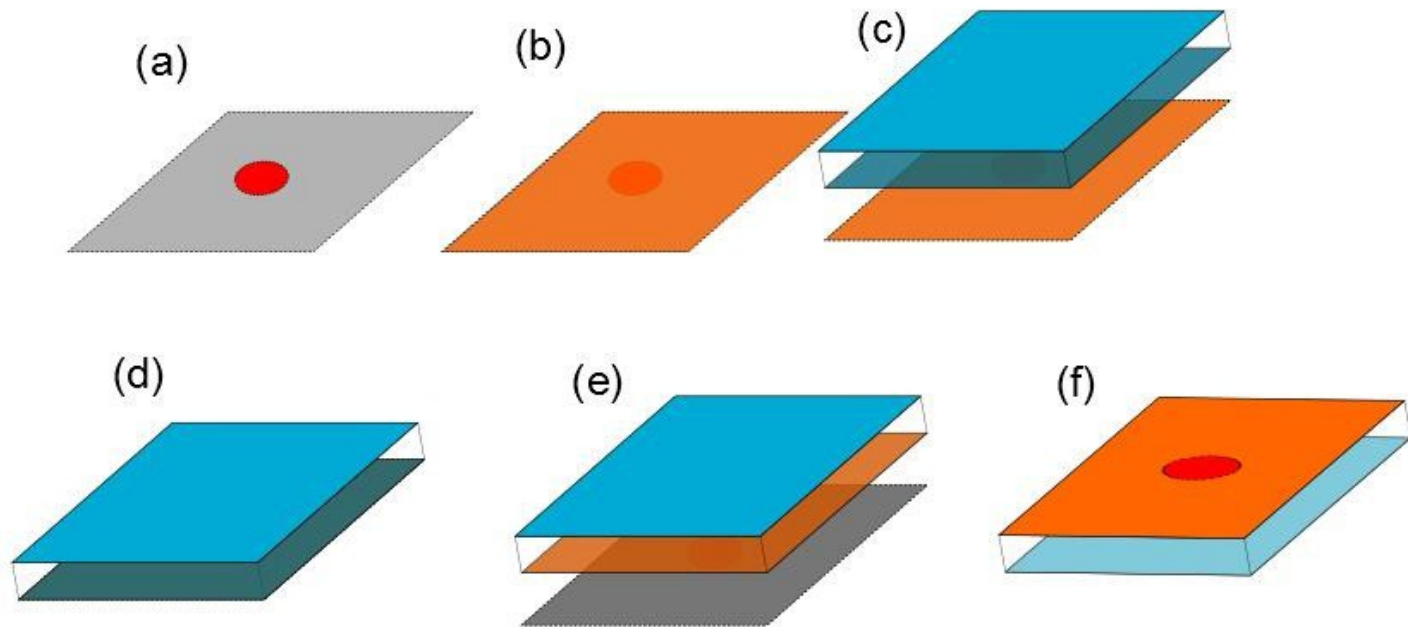

Supplement: c9nr08745a8.pdf [file c9nr08745a8.pdf]

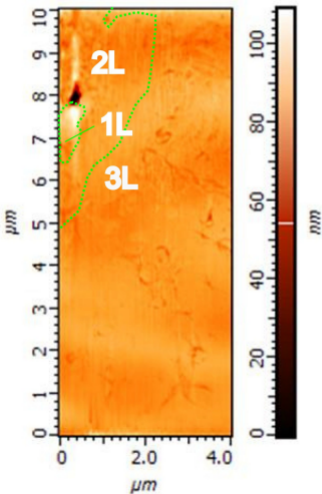

Supplement: c9nr08745a9.pdf [file c9nr08745a9.pdf]
